# Supplementary material
Source: publisher figshare collection journal article supplement (https://acs.figshare.com/ndownloader/files/3849895)
Supplement: Supplementary file 1 [file 3849895]

**Supporting Information for**

**Electrospray Droplet Exposure to Organic Vapors:  
Metal Ion Removal from Proteins and Protein Complexes**

J. Corinne DeMuth and Scott A. McLuckey\*

Department of Chemistry  
Purdue University  
West Lafayette, IN 47907-2084

## Supporting Information: Supplemental Figures S1-S5

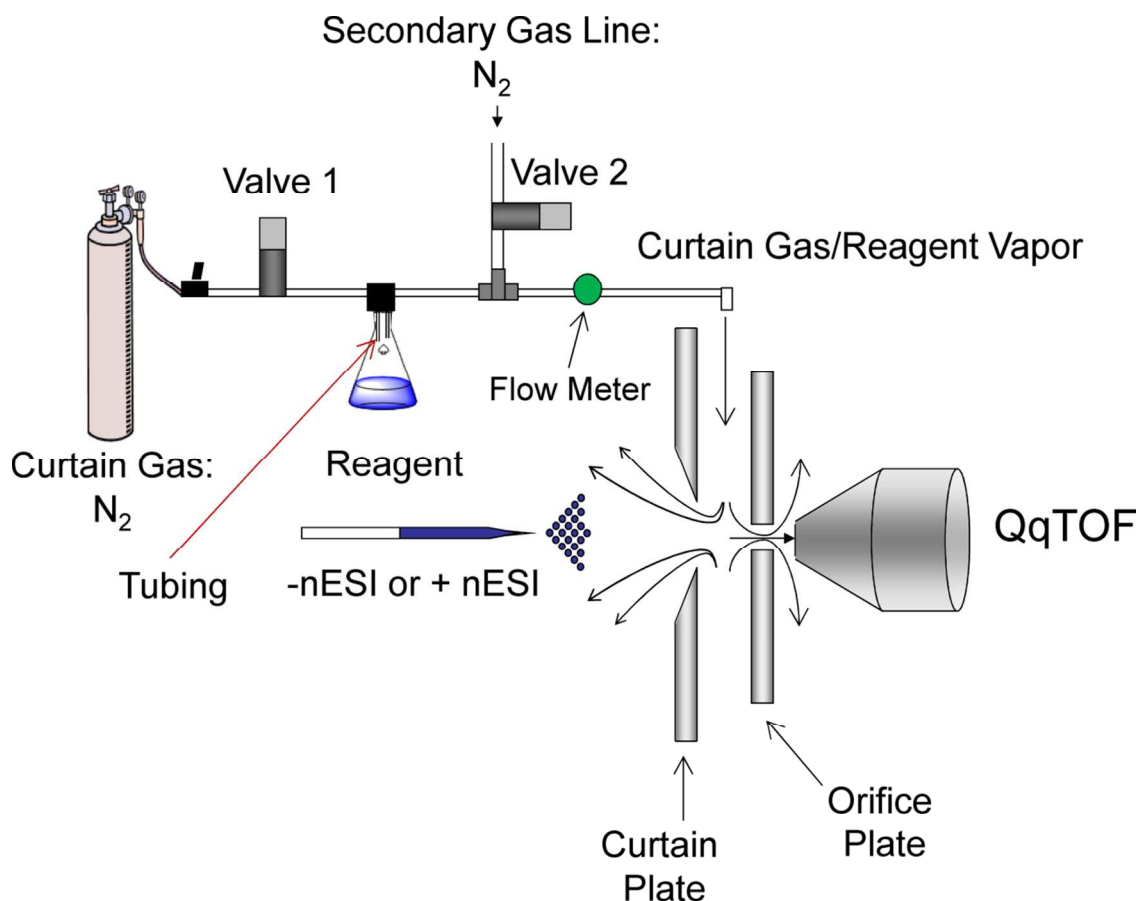

**Supplemental Figure S-1.** Diagram of Vapor Introduction Setup. Using Swagelok valve 1, a desired amount of N<sub>2</sub> curtain gas is directed across a 125-mL Erlenmeyer flask containing reagent. Above the flask, there is tubing, which allows N<sub>2</sub> to enter the flask and tubing that allows N<sub>2</sub> entrained with reagent vapor to exit the flask. A secondary N<sub>2</sub> gas line, which is controlled using Swagelok valve 2, is used to bring the total flow rate of curtain gas/reagent vapor to 1.1 L/min as measured using a flow meter. The curtain gas containing reagent vapor is exposed to nanoelectrospray ionized (nESI) droplets between the curtain plate and the orifice plate of a QqTOF.

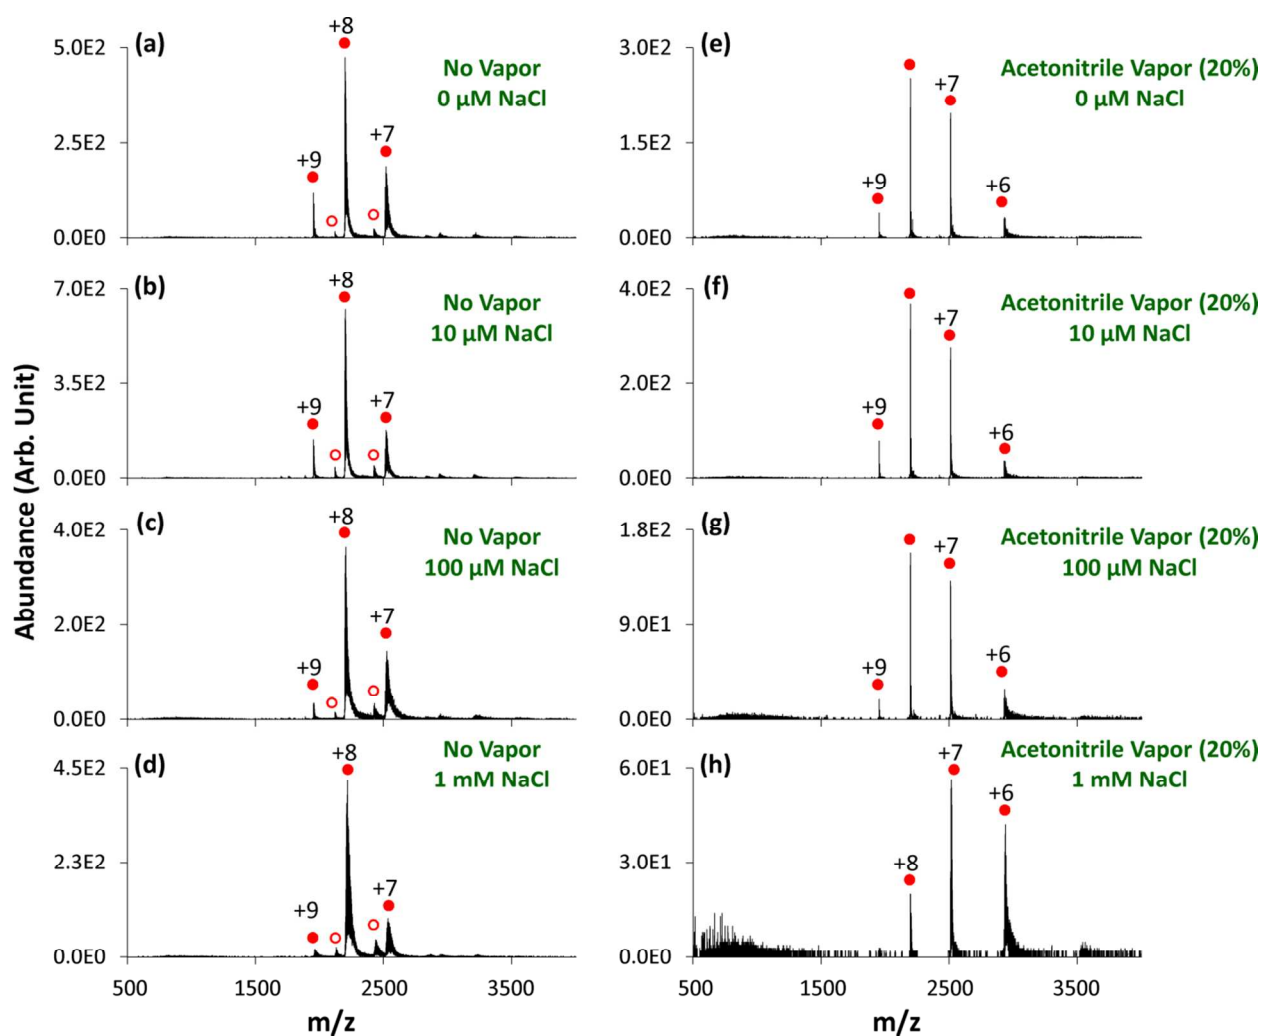

**Supplemental Figure S-2.** Positive nESI of 10  $\mu\text{M}$  holomyoglobin prepared in (a) 1 mM ammonium acetate with no added NaCl, (b) 10  $\mu\text{M}$  NaCl, (c) 100  $\mu\text{M}$  NaCl, and (d) 1 mM NaCl with no reagent vapor exposure and with acetonitrile vapor (20%) exposure, respectively (e)-(h). Holomyoglobin peaks are denoted with the red filled circle symbol (●) while apomyoglobin peaks are denoted with the red open circle symbol (○).

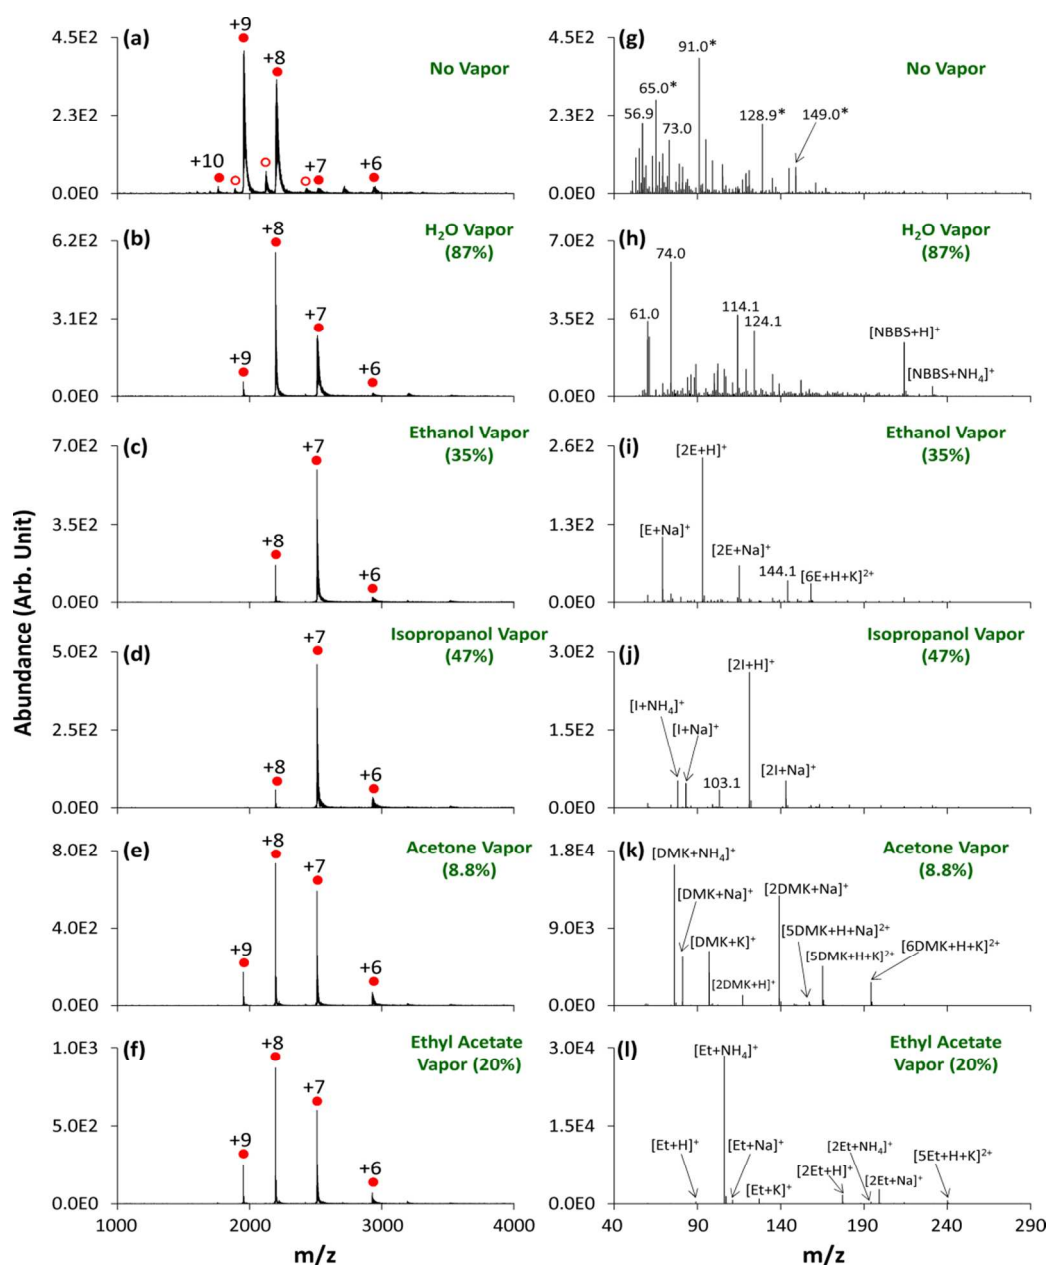

**Supplemental Figure S-3.** Positive nESI of 10  $\mu\text{M}$  holomyoglobin prepared in 1 mM ammonium acetate with (a) no vapor, (b) 87% water vapor, (c) 35% ethanol vapor where E denotes an ethanol molecule, (d) 47% isopropanol vapor where Ip denotes an isopropanol molecule, (e) 8.8% acetone vapor where DMK denotes an acetone molecule, and (f) 20% ethyl acetate vapor where Et represents an ethyl acetate molecule with spectra obtained at the respective low  $m/z$  range (g)-(l). Holomyoglobin peaks are denoted with the red filled circle symbol (●) while apomyoglobin peaks are denoted with the red open circle symbol (○). N-butylbenzenesulfonamide (NBBS) is a plasticizer contaminant present in the tubing within the instrument. \* In spectrum (f), the  $m/z$  65 is  $\text{C}_5\text{H}_5^+$ , the  $m/z$  91.0 is  $\text{C}_7\text{H}_7^+$ , the  $m/z$  128.9 is protonated naphthalene, and  $m/z$  149.0 is protonated phthalic anhydride. These peaks are most likely contaminants derived from the instrument tubing.

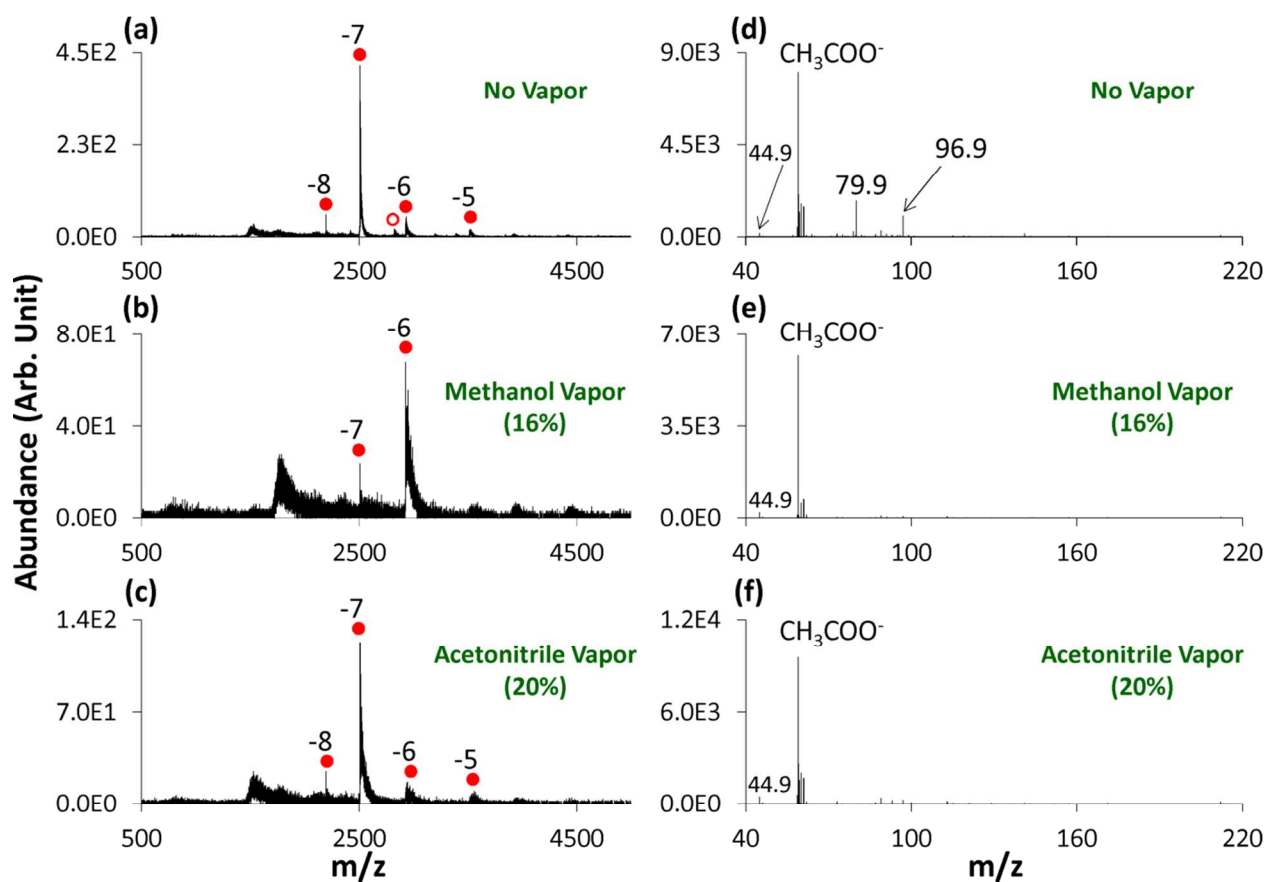

**Supplemental Figure S-4.** Negative nESI mass spectra of holomyoglobin (10  $\mu$ M) present in ammonium acetate (1 mM) with (a) no vapor, (b) 16% methanol vapor, and (c) 20% acetonitrile vapor with spectra obtained for respective low m/z ions (d-f). In spectra (d)-(f), the m/z 44.9 ion is attributed to  $[\text{HCO}_2]^-$ . In spectrum (d), the m/z 96.9 ion is either  $[\text{H}_2\text{PO}_4]^-$  or  $[\text{HSO}_4]^-$  whereas m/z 79.9 is  $[\text{SO}_3^\bullet]^-$ . The m/z 44.9, 79.9, and 96.9 ions are attributed to contaminants derived from the myoglobin stock purchased from Sigma. Holomyoglobin peaks are denoted with the red filled circle symbol (●) while apomyoglobin peaks are denoted with the red open circle symbol (○).

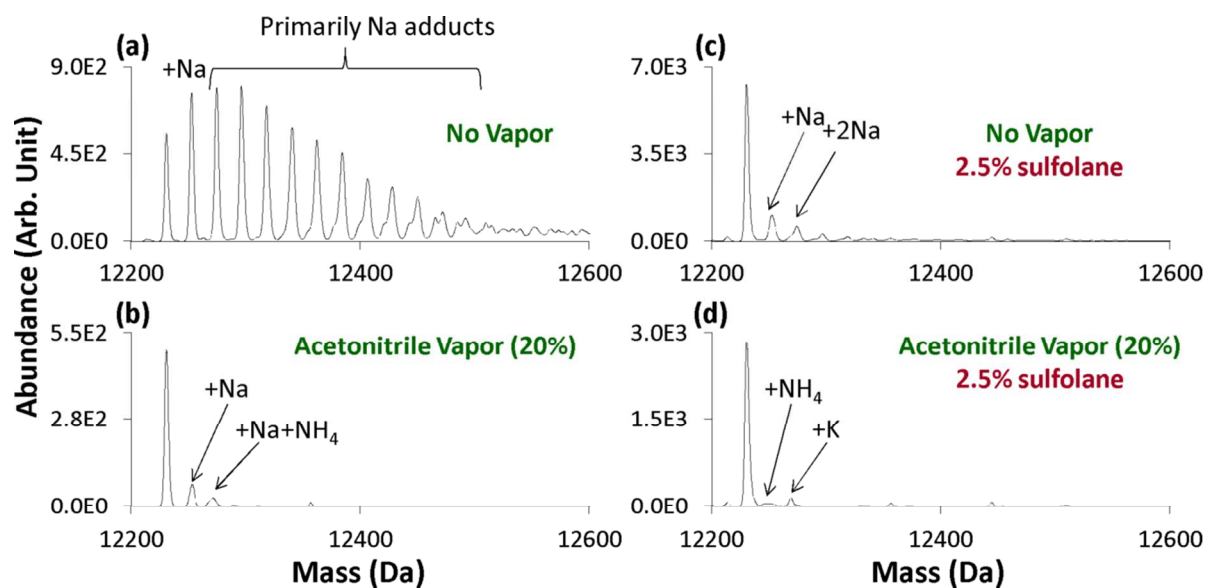

**Supplemental Figure S-5.** Deconvoluted positive nESI mass spectra of cytochrome c (10  $\mu$ M) prepared in NaCl (1 mM) and ammonium bicarbonate (10 mM) (a) and (b) in addition to 2.5% sulfolane (c) and (d). The nESI droplets were exposed to no vapors (a) and (c) and 20% acetonitrile vapor (b) and (d).
